# Supplementary material for: Li-ion conductivity in Li 2 OHCl 1− x Br x solid electrolytes: grains, grain boundaries and interfaces
Source: Royal Society of Chemistry journal article supplement (doi:10.1039/d2ta01462a), 2022-01-01
Supplement: d2ta01462a1.pdf [file d2ta01462a1.pdf]

## Supplementary Information

### Li-ion conductivity in $\text{Li}_2\text{OHCl}_{1-x}\text{Br}_x$ solid electrolytes: grains, grain boundaries and interfaces

Hyeon Jeong Lee<sup>a</sup>, Brigita Darminto<sup>a</sup>, Sudarshan Narayanan<sup>a</sup>, Maria Diaz-Lopez<sup>b</sup>, Albert W. Xiao<sup>a</sup>, Yvonne Chart<sup>a</sup>, Ji Hoon Lee<sup>c</sup>, James A. Dawson<sup>d,e</sup>, and Mauro Pasta<sup>a,\*</sup>

<sup>a</sup>Department of Materials, University of Oxford, Parks Road, Oxford OX1 3PH, United Kingdom

<sup>b</sup>Diamond Light Source Ltd., Diamond House, Harwell Science and Innovation Campus, Didcot, OX11 0DE, United Kingdom

<sup>c</sup>School of Materials Science and Engineering, Kyungpook National University, 80 Daehak-ro, Buk-gu, Daegu 41566, Republic of Korea

<sup>d</sup>Chemistry - School of Natural and Environmental Sciences, Newcastle University, Newcastle upon Tyne, NE1 7RU, United Kingdom

<sup>e</sup>Centre for Energy, Newcastle University, Newcastle upon Tyne, NE1 7RU, United Kingdom

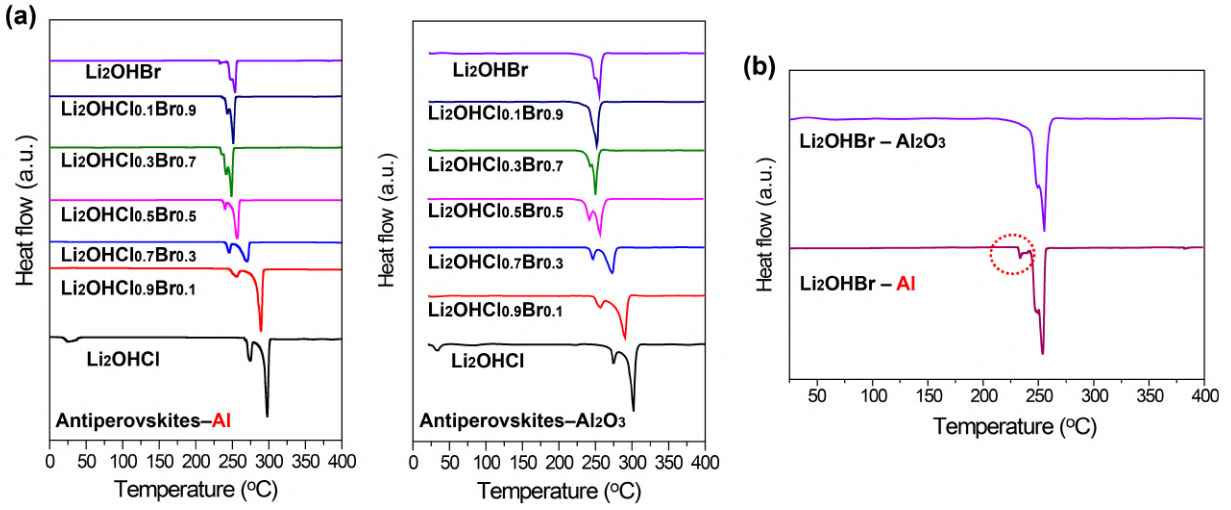

**Fig. S1** (a) DSC spectra of  $\text{Li}_2\text{OHCl}_{1-x}\text{Br}_x$  ( $x=0, 0.1, 0.3, 0.5, 0.7, 0.9, 1$ ) antiperovskites measured with aluminium pan(left) and alumina crucible(right). A small endothermic peak was observed below the local disordering temperature of the  $\text{Li}_2\text{OHCl}_{1-x}\text{Br}_x$  series which was measured in an aluminium pan and lid setup. (b) Comparative DSC spectra of  $\text{Li}_2\text{OHBr}$  measured with alumina crucible and aluminium pan.

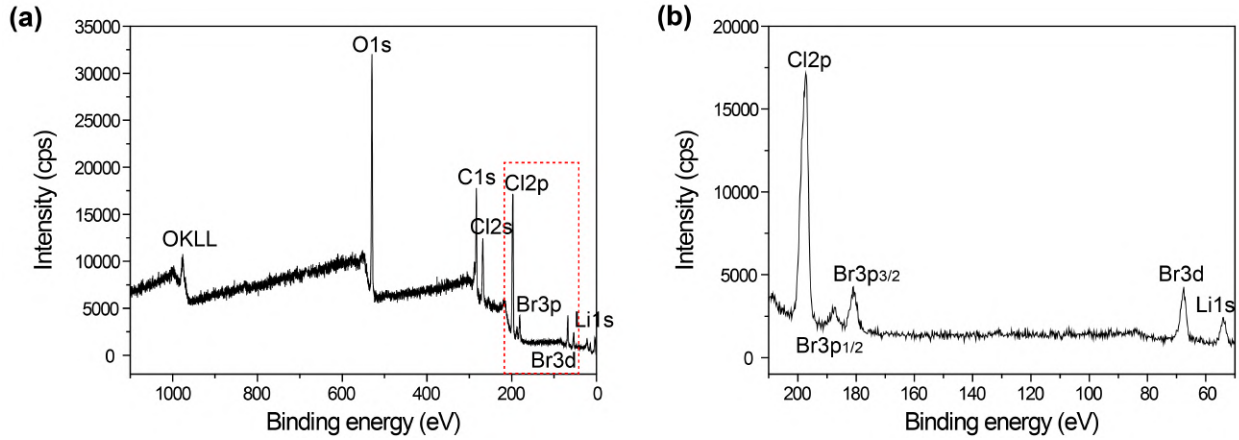

**Fig. S2** (a) Survey spectrum of as-synthesized  $\text{Li}_2\text{OHCl}_{0.9}\text{Br}_{0.1}$ . (b) A zoomed survey spectrum in the energy range of 50–210 eV. Al 2p ( $\sim 75$  eV) and Al 2s ( $\sim 120$  eV) peaks were not observed.

|                          | Li <sub>2</sub> OHCl                      |             |             | Li <sub>2</sub> OHBr |
|--------------------------|-------------------------------------------|-------------|-------------|----------------------|
|                          | phase a                                   | phase b     | LiCl        | phase a              |
| Space group              | Pmc2 <sub>1</sub>                         | Pm3m        | Fm3m        | Pm3m                 |
| Lattice parameter (Å)    | a=3.8777(2)<br>b=3.8301(2)<br>c=8.0004(4) | a=3.9080(1) | a=5.1478(8) | a=4.04727(3)         |
| Volume (Å <sup>3</sup> ) | 118.822(8)                                | 59.684(5)   | 136.42(6)   | 66.296(2)            |
| Weight fraction (%)      | 52.8(1)                                   | 43.4(5)     | 3.7(2)      | 100                  |
| R <sub>p</sub> (%)       | 8.81                                      |             |             | 5.17                 |
| R <sub>wp</sub> (%)      | 12.15                                     |             |             | 7.14                 |
| R <sub>exp</sub> (%)     | 1.25                                      |             |             | 0.96                 |

**Table S1.** Refined lattice parameters, cell volumes, and weight fraction of each phase in Li<sub>2</sub>OHCl and Li<sub>2</sub>OHBr.

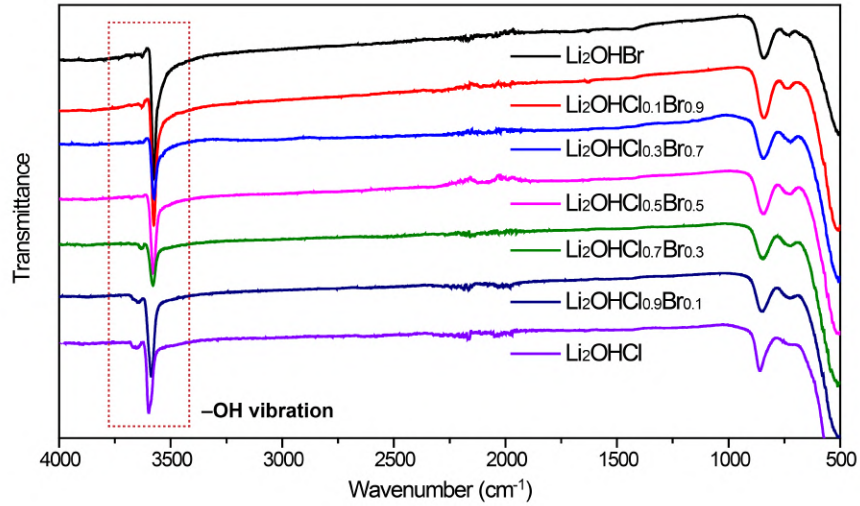

**Fig. S3** FT-IR spectra of Li<sub>2</sub>OHCl<sub>1-x</sub>Br<sub>x</sub> (x=0, 0.1, 0.3, 0.5, 0.7, 0.9, 1) antiperovskites.

| Composition                                           | Lattice parameter(Å) |
|-------------------------------------------------------|----------------------|
| Li <sub>2</sub> OHCl <sub>0.9</sub> Br <sub>0.1</sub> | 3.92104              |
| Li <sub>2</sub> OHCl <sub>0.7</sub> Br <sub>0.3</sub> | 3.95091              |
| Li <sub>2</sub> OHCl <sub>0.5</sub> Br <sub>0.5</sub> | 3.97906              |
| Li <sub>2</sub> OHCl <sub>0.3</sub> Br <sub>0.7</sub> | 4.00665              |
| Li <sub>2</sub> OHCl <sub>0.1</sub> Br <sub>0.9</sub> | 4.03444              |
| Li <sub>2</sub> OHBr                                  | 4.04727              |

**Table S2.** Lattice parameters of cubic phase Li<sub>2</sub>OHCl<sub>1-x</sub>Br<sub>x</sub> based on XRD patterns measured at the room temperature.

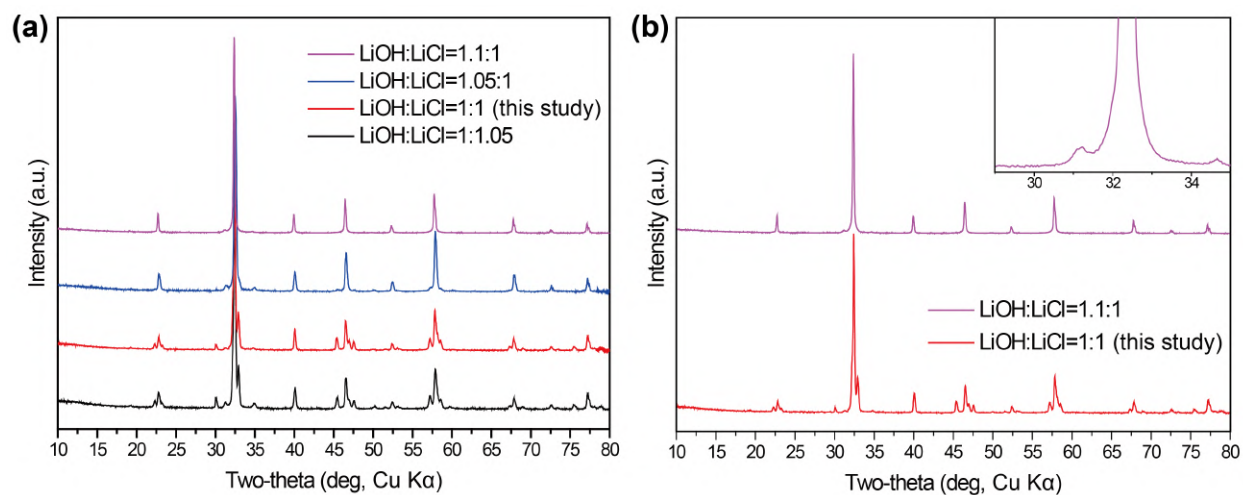

**Fig. S4** Comparison of XRD patterns for lithium hydroxide chlorides synthesized with varied LiOH/LiCl molar ratios. Sub-stoichiometric lithium hydroxide chlorides were synthesized under LiCl deficiency (Molar ratios of 1.05:1 (as LiOH:LiCl) and 1.1:1 were used.). The phase transformation in sub-stoichiometric lithium hydroxide chlorides was observed and they contain minor impurities as well.

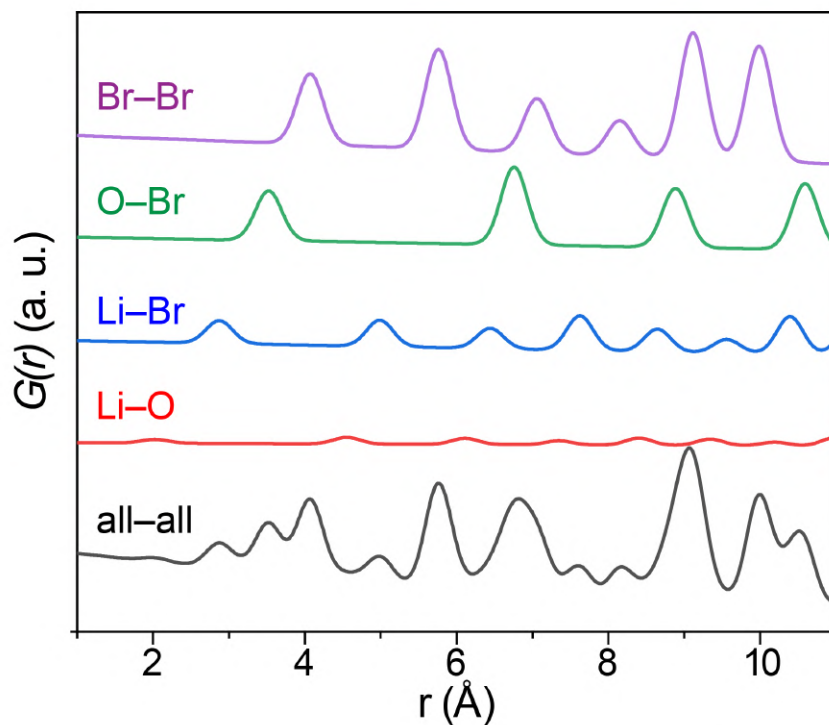

**Fig. S5** Calculated PDF pattern of  $\text{Li}_2\text{OHBr}$  with the  $\text{Pm}\bar{3}\text{m}$  symmetry, and their partial PDFs of different atom-atom pairs.

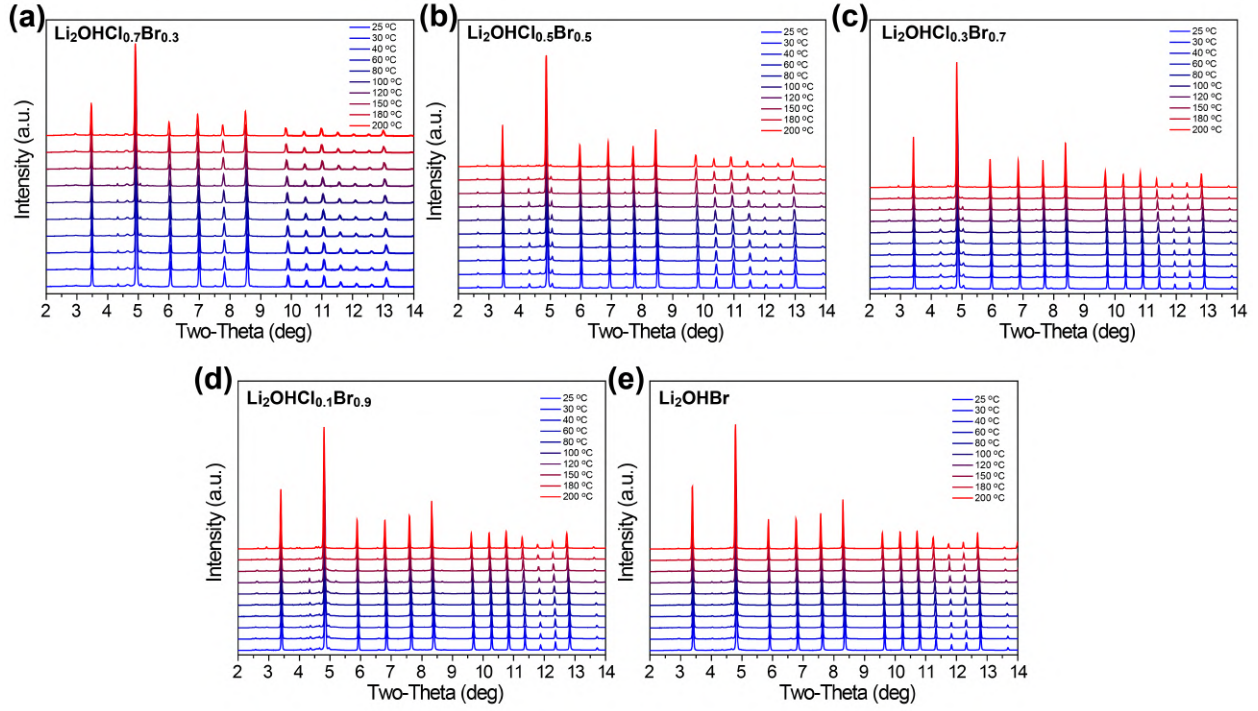

**Fig. S6** *In situ* high temperature XRD patterns of (a)  $\text{Li}_2\text{OHCl}_{0.7}\text{Br}_{0.3}$ , (b)  $\text{Li}_2\text{OHCl}_{0.5}\text{Br}_{0.5}$ , (c)  $\text{Li}_2\text{OHCl}_{0.3}\text{Br}_{0.7}$ , (d)  $\text{Li}_2\text{OHCl}_{0.1}\text{Br}_{0.9}$ , and (e)  $\text{Li}_2\text{OHBr}$  during heating process in the temperature range of 25–200 °C.

| Temperature (°C) | $\text{Li}_2\text{OHCl}$ | $\text{Li}_2\text{OHCl}_{0.9}\text{Br}_{0.1}$ | $\text{Li}_2\text{OHCl}_{0.7}\text{Br}_{0.3}$ | $\text{Li}_2\text{OHCl}_{0.5}\text{Br}_{0.5}$ | $\text{Li}_2\text{OHCl}_{0.3}\text{Br}_{0.7}$ | $\text{Li}_2\text{OHCl}_{0.1}\text{Br}_{0.9}$ | $\text{Li}_2\text{OHBr}$ |
|------------------|--------------------------|-----------------------------------------------|-----------------------------------------------|-----------------------------------------------|-----------------------------------------------|-----------------------------------------------|--------------------------|
| 25               |                          | 3.92104                                       | 3.95091                                       | 3.97906                                       | 4.00665                                       | 4.03444                                       | 4.0472                   |
| 30               |                          | 3.9217                                        | 3.95164                                       | 3.98002                                       | 4.00737                                       | 4.03518                                       | 4.04795                  |
| 40               | 3.91077                  | 3.92314                                       | 3.95317                                       | 3.98137                                       | 4.00895                                       | 4.03676                                       | 4.04956                  |
| 60               | 3.91371                  | 3.92608                                       | 3.95634                                       | 3.98466                                       | 4.0122                                        | 4.04008                                       | 4.05285                  |
| 80               | 3.91685                  | 3.92916                                       | 3.95971                                       | 3.988                                         | 4.01568                                       | 4.04367                                       | 4.05643                  |
| 100              | 3.92002                  | 3.93234                                       | 3.96322                                       | 3.9917                                        | 4.01934                                       | 4.04743                                       | 4.06018                  |
| 120              | 3.92371                  | 3.93555                                       | 3.96683                                       | 3.99588                                       | 4.02317                                       | 4.05131                                       | 4.06404                  |
| 150              | 3.92807                  | 3.94029                                       | 3.97241                                       | 4.00127                                       | 4.02887                                       | 4.05705                                       | 4.06978                  |
| 180              | 3.93269                  | 3.94519                                       | 3.97813                                       | 4.00718                                       | 4.03481                                       | 4.06304                                       | 4.076016                 |
| 200              | 3.93623                  | 3.94873                                       | 3.98212                                       | 4.0116                                        | 4.03911                                       | 4.06742                                       | 4.080355                 |

**Table S3.** Lattice parameters of  $\text{Li}_2\text{OHCl}_{1-x}\text{Br}_x$  ( $x=0, 0.1, 0.3, 0.5, 0.7, 0.9, 1$ ) antiperovskites under the cubic symmetry measured at the temperature range of 25–200 °C

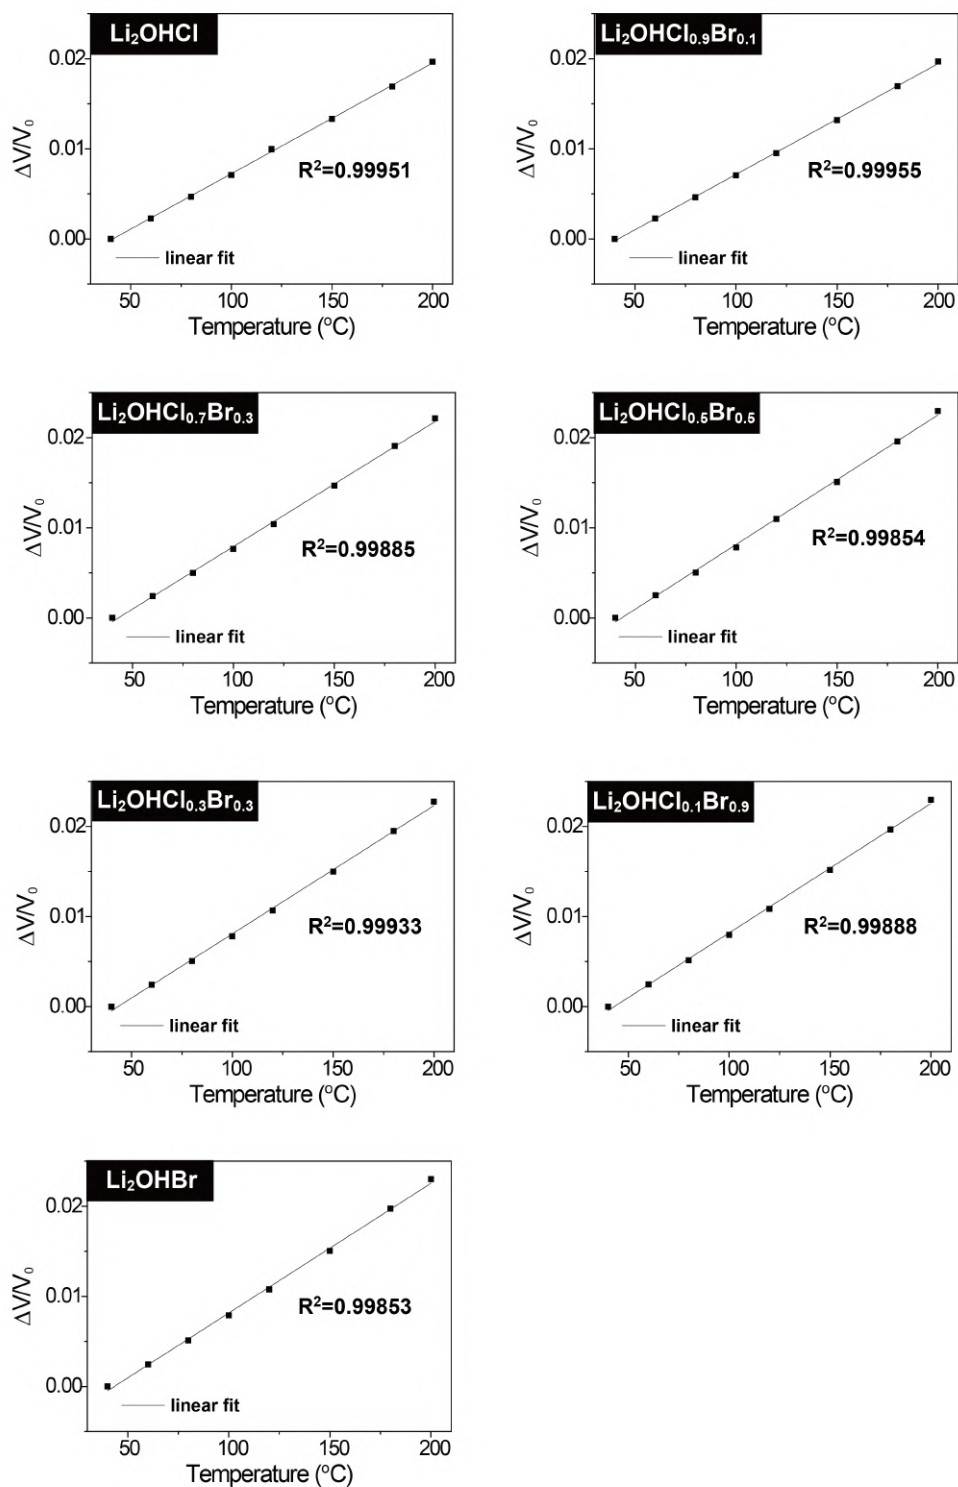

**Fig. S7** Volumetric thermal expansion curves of  $\text{Li}_2\text{OHCl}_{1-x}\text{Br}_x$ .

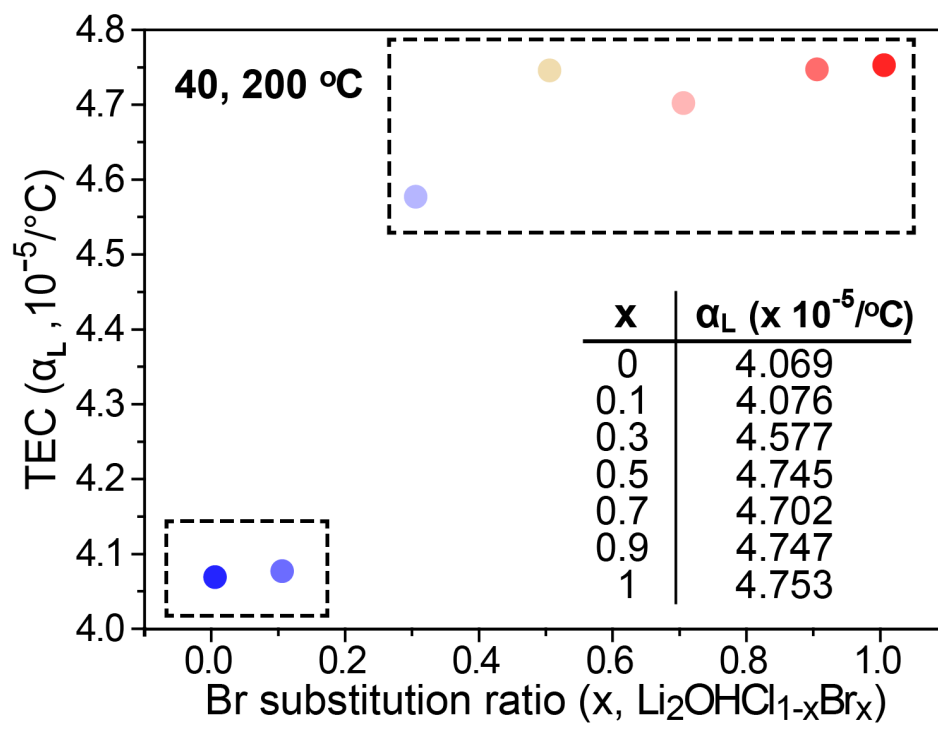

**Fig. S8** Linear thermal expansion coefficients ( $\alpha_L$ ) calculated based on the lattice parameters at 40 and 200 °C



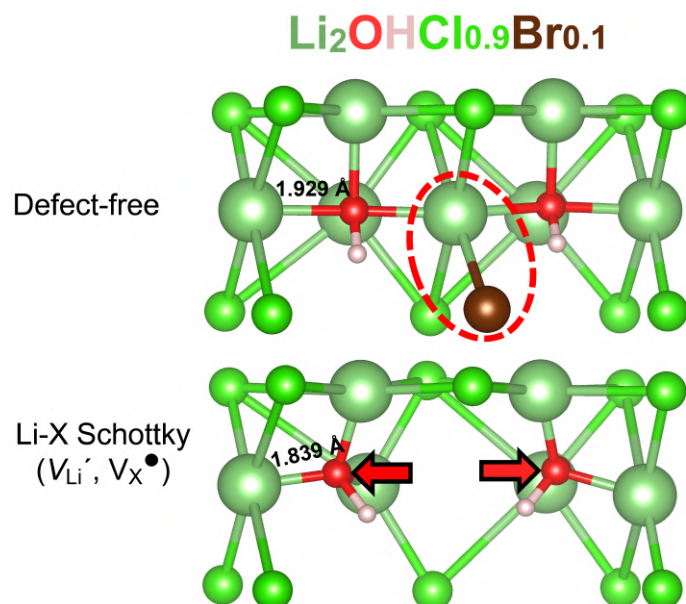

**Fig. S9** Schematic illustration of the local structural relaxation resulting from the introduction of a Li-X Schottky defect pair in  $\text{Li}_2\text{OHCl}_{0.9}\text{Br}_{0.1}$ .

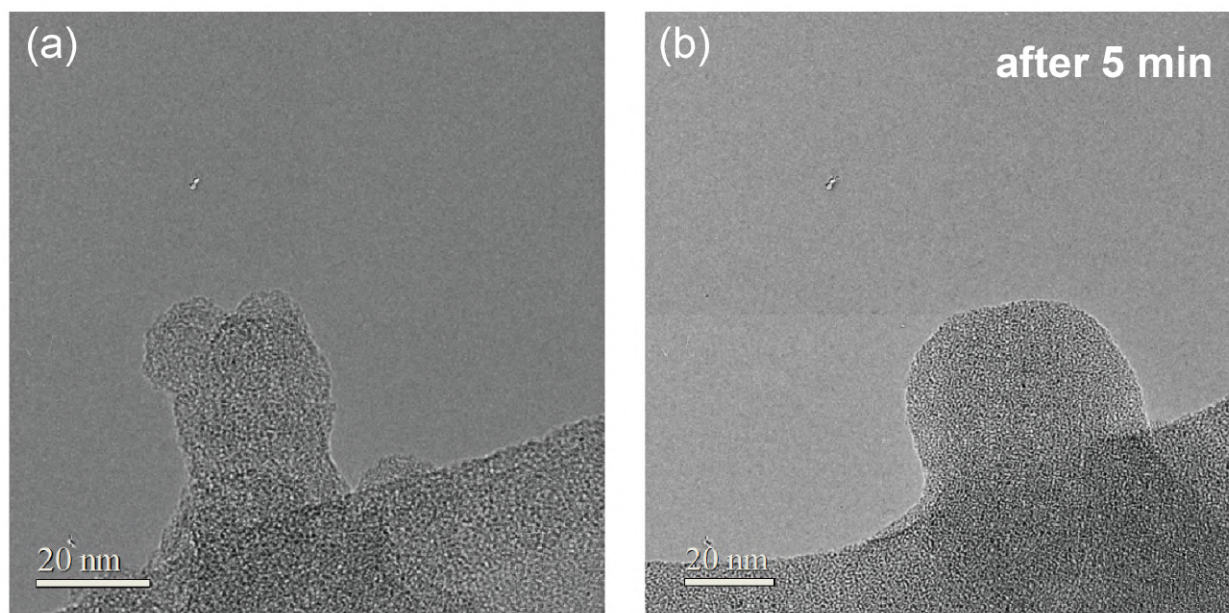

**Fig. S10** TEM images of  $\text{Li}_2\text{OHCl}_{0.9}\text{Br}_{0.1}$  before (a) and after (b) 5 min of exposure in the same region. Particles had agglomerated and transformed to a fully amorphous state.



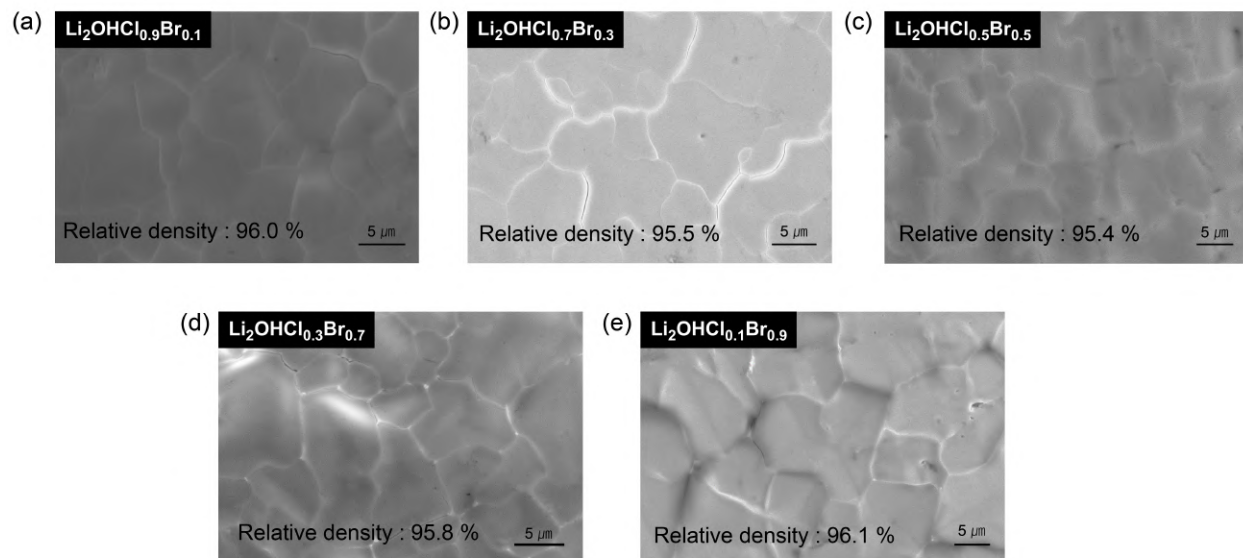

**Fig. S11** Cross-sectional SEM images and relative densities of  $\text{Li}_2\text{OHCl}_{1-x}\text{Br}_x$  pellets ((a-e),  $x=0.1, 0.3, 0.5, 0.7$ , and  $0.9$ , respectively).

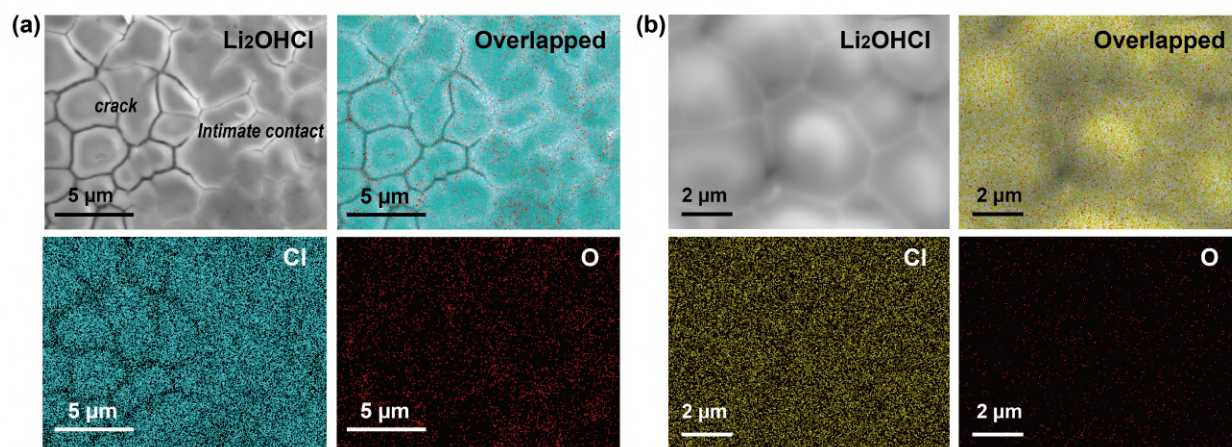

**Fig. S12** Cross-sectional SEM images of  $\text{Li}_2\text{OHCl}$  pellet and corresponding mappings with respect to Cl and O with(a) and without(b) polishing.

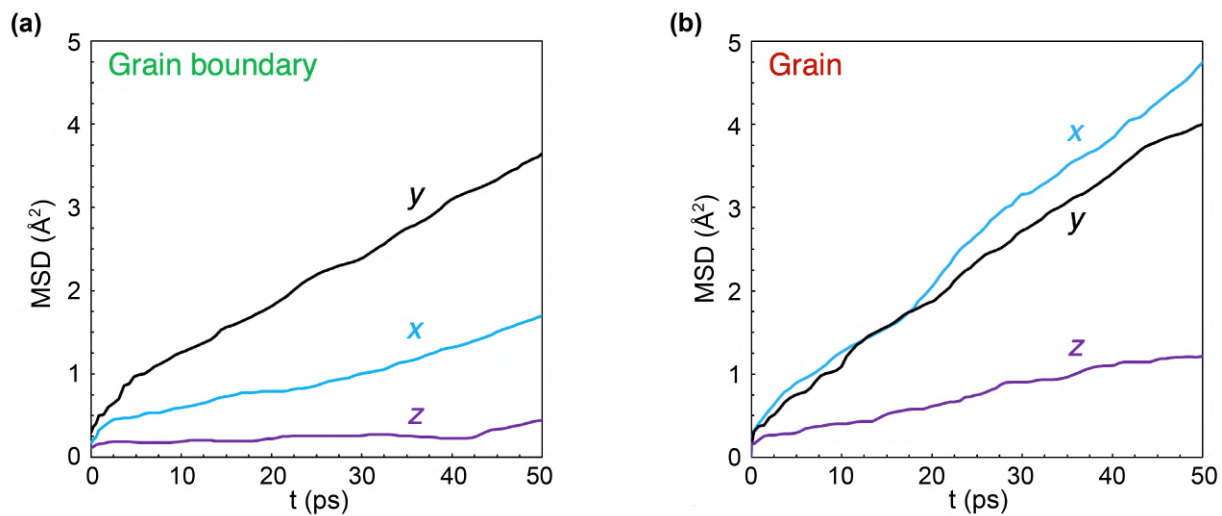

**Fig. S13** MSDs of Li ions for the grain boundary (a) and grain components (b) of the  $\text{Li}_2\text{OHBr}$   $\Sigma 3(111)$  grain boundary at 1000 K in the  $x$ ,  $y$  and  $z$  directions.

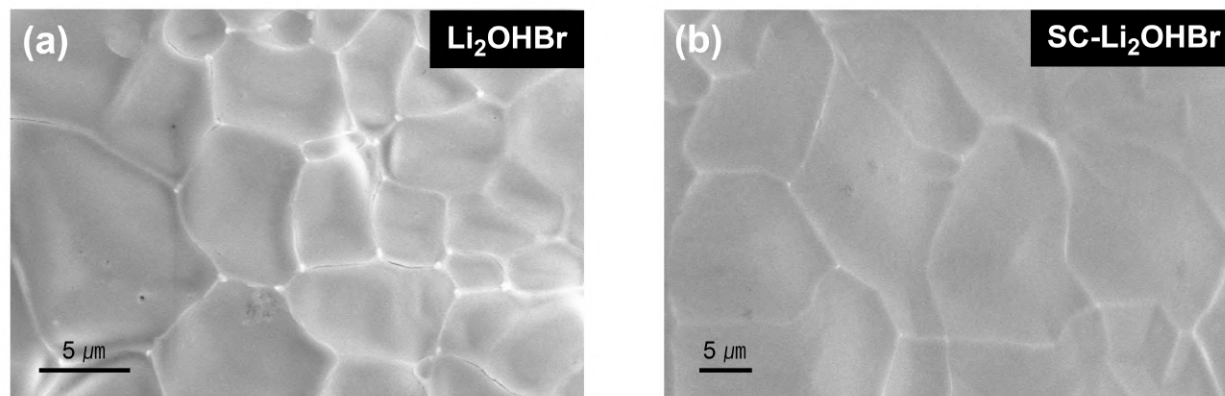

**Fig. S14** Cross-sectional SEM images of (a)  $\text{Li}_2\text{OHBr}$  and (b) slow-cooled  $\text{Li}_2\text{OHBr}$  pellets based on the melting and solidification process.

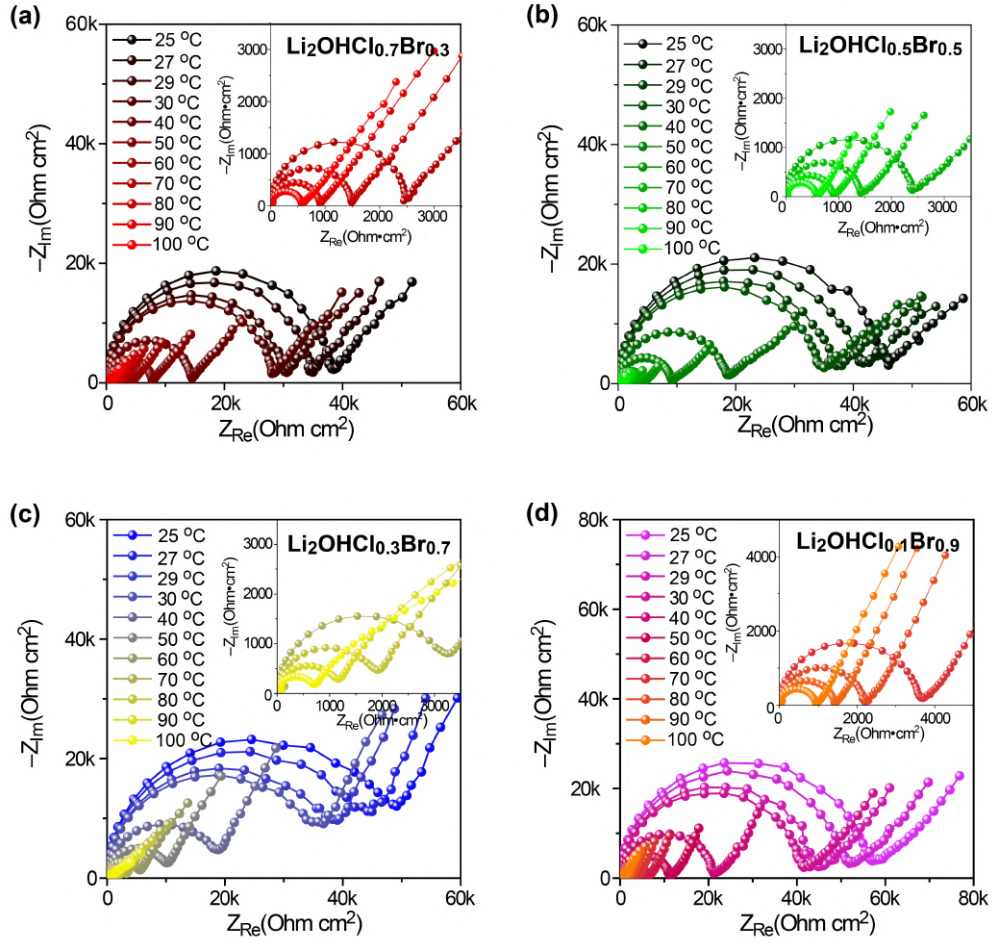

**Fig. S15** EIS spectra of (a)  $\text{Li}_2\text{OHCl}_{0.7}\text{Br}_{0.3}$ , (b)  $\text{Li}_2\text{OHCl}_{0.5}\text{Br}_{0.5}$ , (c)  $\text{Li}_2\text{OHCl}_{0.3}\text{Br}_{0.7}$ , and (d)  $\text{Li}_2\text{OHCl}_{0.1}\text{Br}_{0.9}$  measured at 25–100 °C under Ni/Ni symmetric configuration.

|                        | $\text{Li}_2\text{OHCl}$ | $\text{Li}_2\text{OHCl}_{0.9}\text{Br}_{0.1}$ | $\text{Li}_2\text{OHCl}_{0.7}\text{Br}_{0.3}$ | $\text{Li}_2\text{OHCl}_{0.5}\text{Br}_{0.5}$ | $\text{Li}_2\text{OHCl}_{0.3}\text{Br}_{0.7}$ | $\text{Li}_2\text{OHCl}_{0.1}\text{Br}_{0.9}$ | $\text{Li}_2\text{OHBr}$ |
|------------------------|--------------------------|-----------------------------------------------|-----------------------------------------------|-----------------------------------------------|-----------------------------------------------|-----------------------------------------------|--------------------------|
| 25 °C                  | 0.001927                 | 0.00252                                       | 0.001799                                      | 0.001537                                      | 0.00145                                       | 0.00124                                       | 0.001291                 |
| 27 °C                  | 0.002239                 | 0.002837                                      | 0.001973                                      | 0.001695                                      | 0.001599                                      | 0.001364                                      | 0.001425                 |
| 29 °C                  | 0.002886                 | 0.003229                                      | 0.002262                                      | 0.001842                                      | 0.001858                                      | 0.001561                                      | 0.001608                 |
| 30 °C                  | 0.003175                 | 0.003346                                      | 0.002447                                      | 0.002018                                      | 0.001979                                      | 0.001684                                      | 0.001728                 |
| 40 °C                  | 0.005913                 | 0.0062                                        | 0.00474                                       | 0.003749                                      | 0.003753                                      | 0.003265                                      | 0.003365                 |
| 50 °C                  | 0.010696                 | 0.011272                                      | 0.008714                                      | 0.00763                                       | 0.007539                                      | 0.006176                                      | 0.006431                 |
| 60 °C                  | 0.017782                 | 0.019559                                      | 0.015719                                      | 0.016804                                      | 0.011991                                      | 0.011069                                      | 0.011967                 |
| 70 °C                  | 0.030866                 | 0.032089                                      | 0.027457                                      | 0.029142                                      | 0.020399                                      | 0.019312                                      | 0.020973                 |
| 80 °C                  | 0.047476                 | 0.051119                                      | 0.046709                                      | 0.049309                                      | 0.034139                                      | 0.032756                                      | 0.035138                 |
| 90 °C                  | 0.072773                 | 0.078135                                      | 0.077201                                      | 0.07818                                       | 0.061679                                      | 0.049463                                      | 0.055141                 |
| 100 °C                 | 0.119495                 | 0.115481                                      | 0.122353                                      | 0.119882                                      | 0.106041                                      | 0.07506                                       | 0.084045                 |
| Activation energy (eV) | 0.5288                   | 0.5243                                        | 0.5740                                        | 0.6060                                        | 0.5703                                        | 0.5645                                        | 0.5747                   |

**Table S4.** Li-ion conductivities of  $\text{Li}_2\text{OHCl}_{1-x}\text{Br}_x$  ( $x=0, 0.1, 0.3, 0.5, 0.7, 0.9, 1$ ) antiperovskites measured at various temperatures and the resultant activation energies.



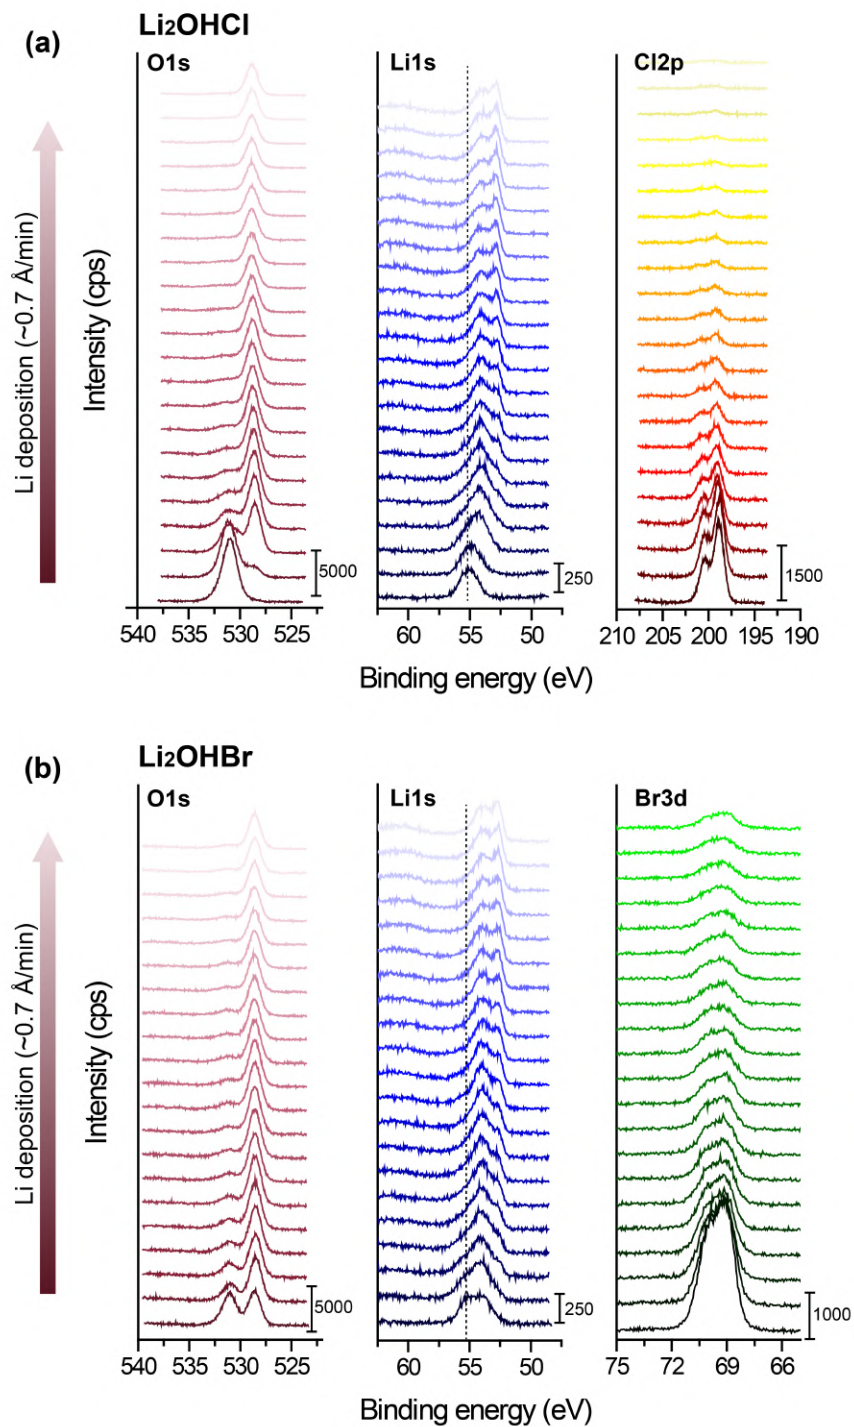

**Fig. S16** O 1s, Li 1s, Cl 2p, and Br 3d XPS spectra of  $\text{Li}_2\text{OHCl}$  (a) and  $\text{Li}_2\text{OHBr}$  (b) as a function of increasing amount of lithium metal being deposited (from bottom to top) at room temperature.

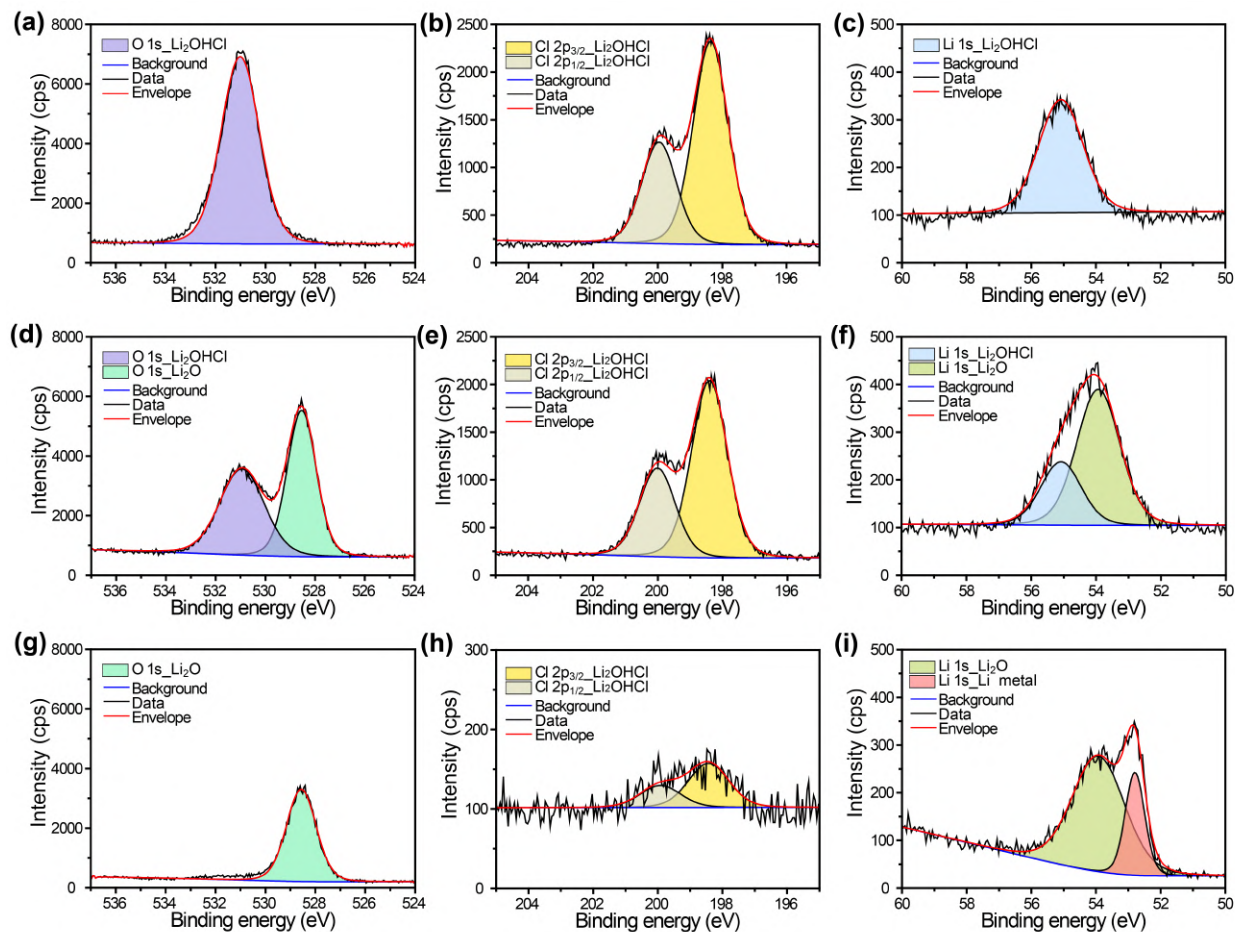

**Fig. S17** Deconvoluted O1s (a, d and g), Cl2p (b, e, and h), and Li1s (c, f, and i) XPS spectra of  $\text{Li}_2\text{OHCl}$  before (a–c), during Li metal sputtering with the estimated Li-metal thickness of 3.5 Å (d–f) and 12.6 nm (g–i).

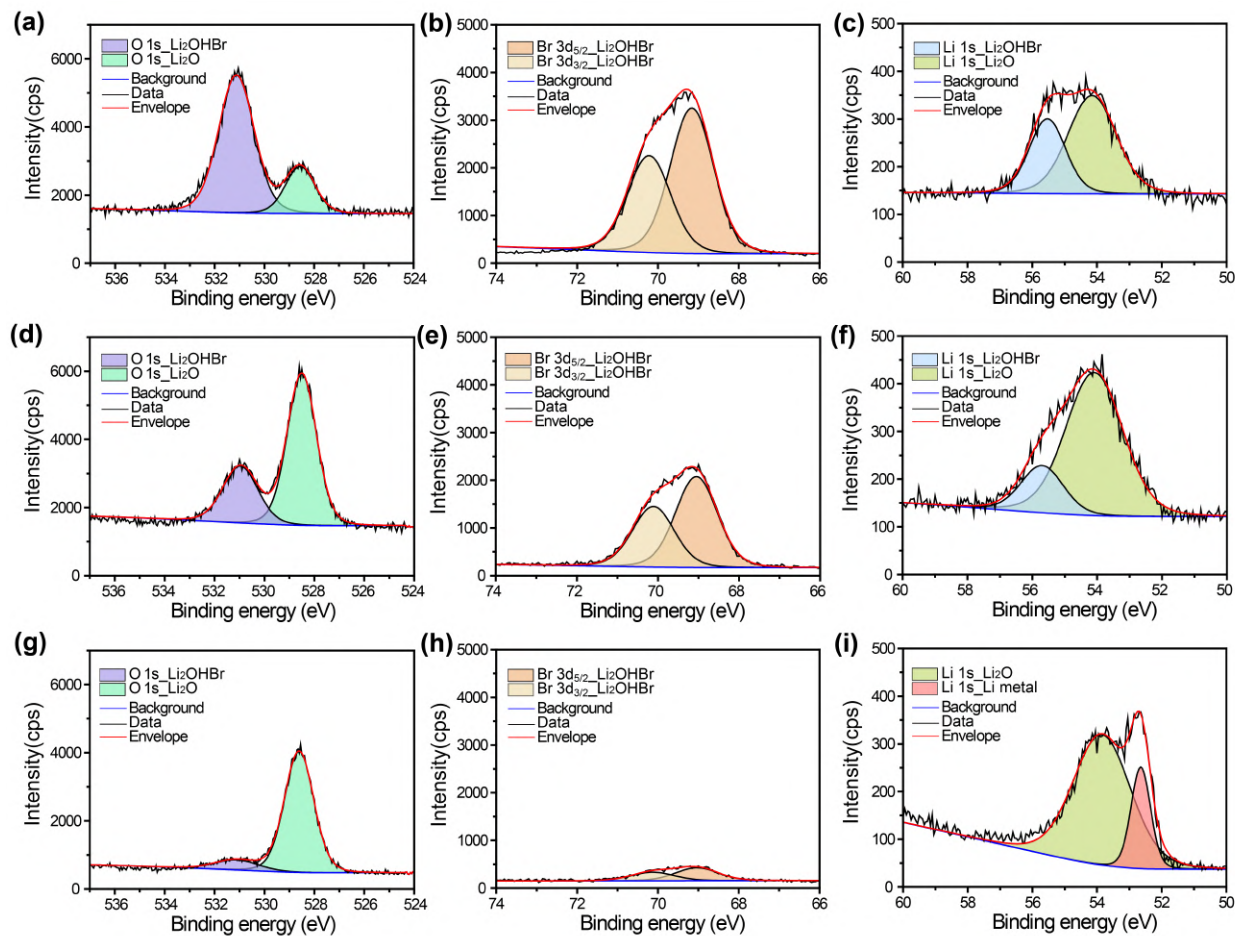

**Fig. S18** Deconvoluted O1s (a, d and g), Br3d (b, e, and h), and Li1s (c, f, and i) XPS spectra of  $\text{Li}_2\text{OHBr}$  during Li metal sputtering with the estimated Li-metal thickness of 3.5 Å (a–c), 10.5 Å (d–f) and 14 nm (g–i).
